# Supplementary material for: Bacteriostatic Activity of LLDPE Nanocomposite Embedded with Sol–Gel Synthesized TiO2/ZnO Coupled Oxides at Various Ratios
Source: PubMed Central journal article supplement (PMC6403739; doi:10.3390/polym10080878), 2018-08-06
Supplement: polymers-10-00878-s001.pdf [file polymers-10-00878-s001.pdf]

Figure S1

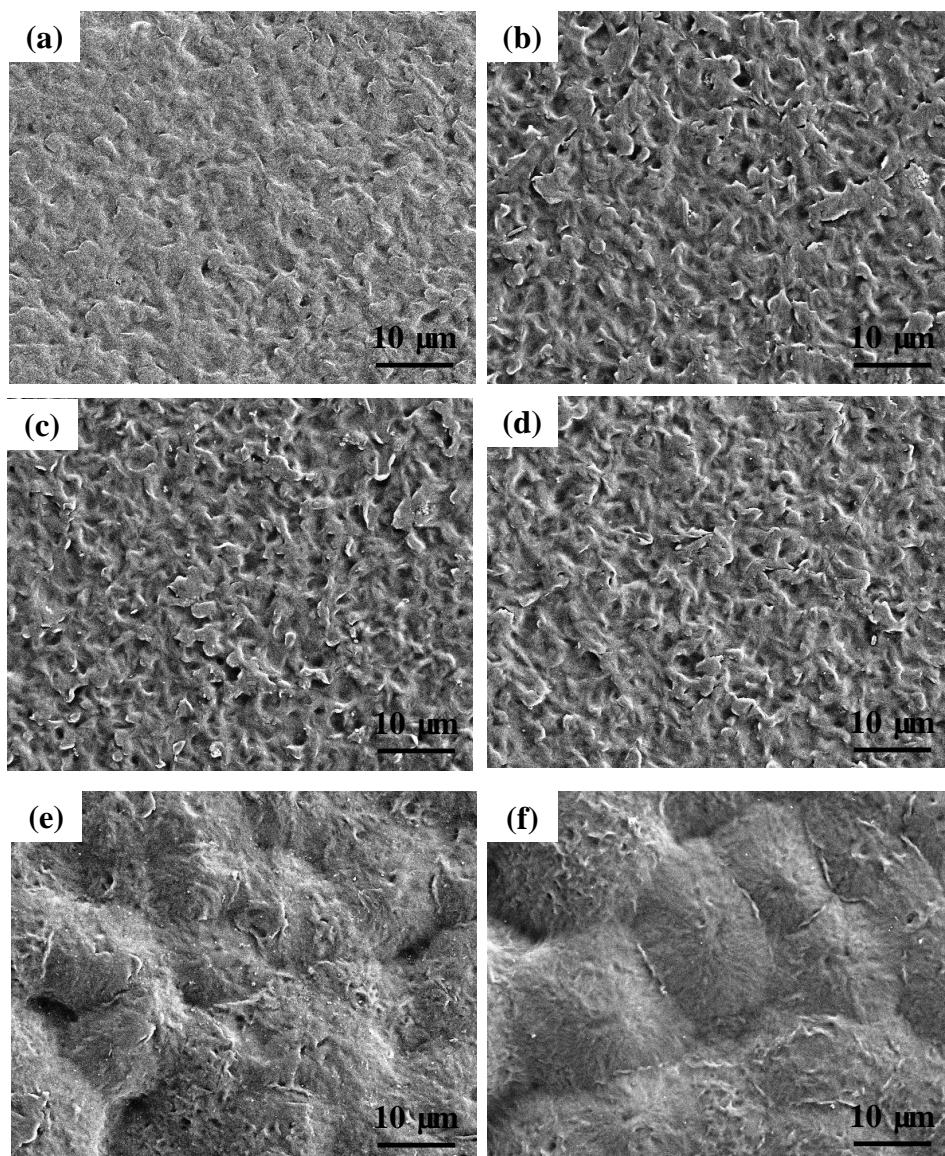

**Figure S1.** FESEM (magnification: 1000 ×) images of surface morphology of (a) bare LLDPE, (b) LLDPE/100T, (c) LLDPE/75T25Z, (d) LLDPE/50T50Z, (e) LLDPE/25T75Z and (f) LLDPE/100Z.

Figure S2

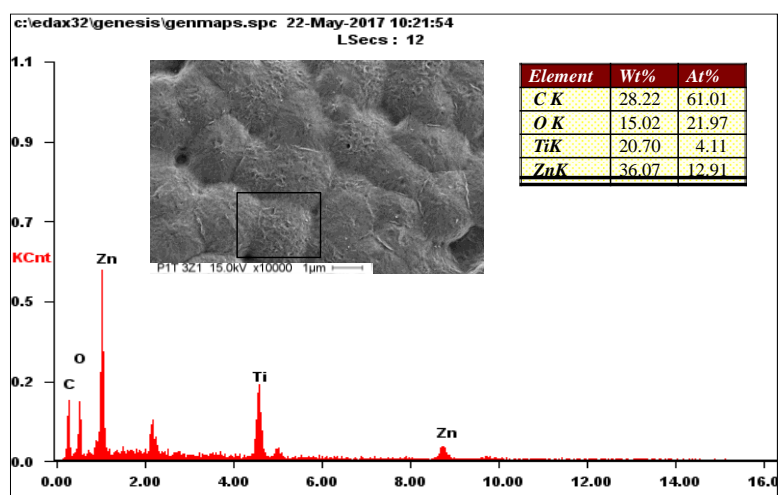

Figure S2. FESEM image and EDX spectrum of LLDPE/75T25Z

Figure S3

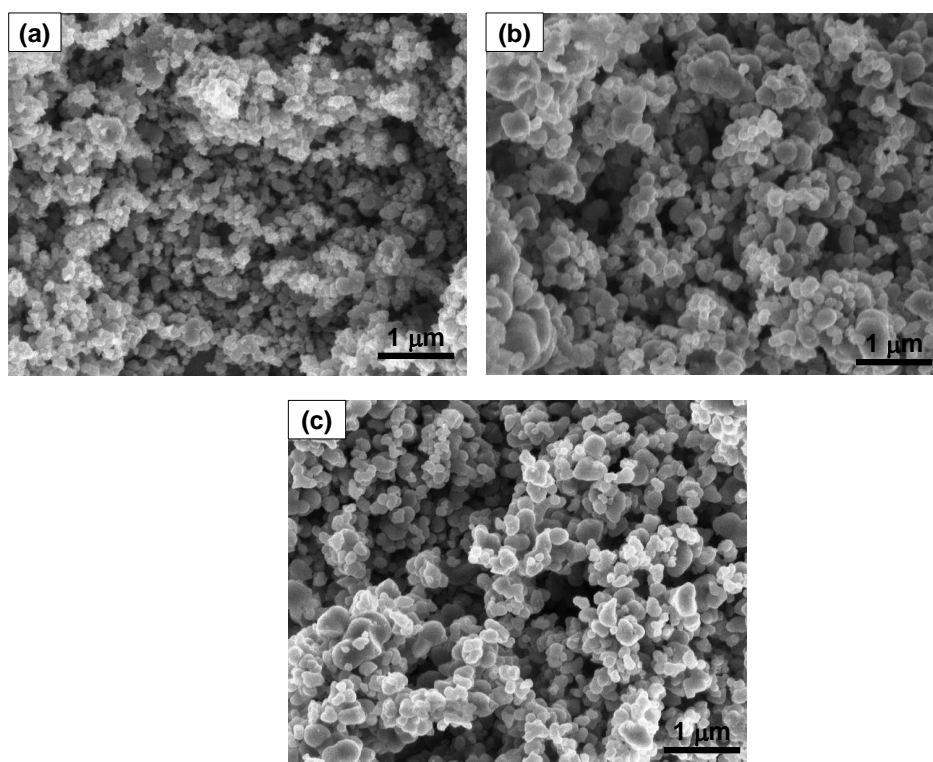

Figure S3. FESEM images of (a) 100T, (b) 100Z and (c) 25T75Z

Table S1

**Table S1.** Phase present in 100T, 75T25Z, 50T50Z, 25T75Z and 100Z nanoparticles as obtained in XRD analysis

| Sample | Phase present                                                                     |
|--------|-----------------------------------------------------------------------------------|
| 100T   | TiO <sub>2</sub> (anatase)                                                        |
| 75T25Z | Anatase, hexagonal zinc titanate (ZnTiO <sub>3</sub> ), TiO <sub>2</sub> (rutile) |
| 50T50Z | Cubic zinc titanate (c-Zn <sub>2</sub> Ti <sub>3</sub> O <sub>8</sub> )           |
| 25T75Z | c-Zn <sub>2</sub> Ti <sub>3</sub> O <sub>8</sub> , ZnO (zincite)                  |

Table S2

**Table S2.** At% of Zn an Ti of the corresponding metal oxide

| <b>Metal oxide</b> | <b>At%</b> |           |
|--------------------|------------|-----------|
|                    | <b>Zn</b>  | <b>Ti</b> |
| <b>100T</b>        | 0          | 33.01     |
| <b>75T25Z</b>      | 11.13      | 32.23     |
| <b>50T50Z</b>      | 20.09      | 23.11     |
| <b>25T75Z</b>      | 31.11      | 10.48     |
| <b>100Z</b>        | 52.03      | 0         |
